# Supplementary material
Source: PubMed Central journal article supplement (PMC2941284)
Supplement: 1002176107_pnas.201002176SI.pdf [file 1002176107_pnas.201002176SI.pdf]

# Supporting Information

Chiang et al. 10.1073/pnas.1002176107

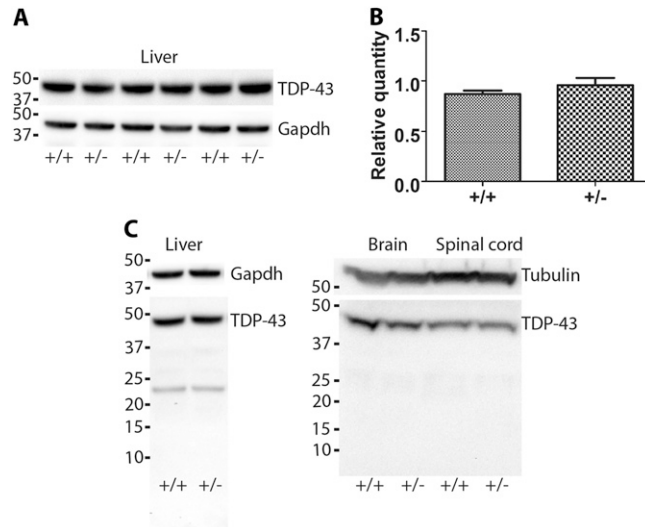

**Fig. S1.** Levels of TDP-43 in *Tardbp*<sup>+/-</sup> mice. (A) Tissue lysates of livers harvested from 6-wk-old control and *Tardbp*<sup>+/-</sup> mice were subjected to protein blot analysis using antisera against TDP-43. The blot was reprobed using an antibody to GAPDH. (B) Note comparable levels of TDP-43 were observed in the liver tissues between *Tardbp*<sup>+/-</sup> mice and control mice ( $n = 3$  pairs of independent animals, mean  $\pm$  SEM). (C) Lysates of liver, brain, and spinal cord from control and *Tardbp*<sup>+/-</sup> mice subjected to protein blot analysis using an anti-N-terminal TDP-43 antibody. Note that we failed to detect any putative N-terminal fragments of TDP-43 of the predicted molecular weight as a result of deletion of exon 3 in *Tardbp*<sup>+/-</sup> mice. An approximate 20 to 25 kDa band observed in liver extract of *Tardbp*<sup>+/-</sup> mice is likely nonspecific considering the similar band intensities also seen in that of control. Anti-GAPDH and anti- $\alpha$ -tubulin antisera served as the loading controls for liver and brain/spinal cord, respectively.

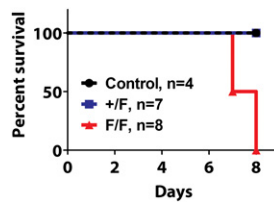

**Fig. S2.** Rapid lethality in *R26-ErCre;Tardbp*<sup>F/F</sup> mice. Kaplan-Meier survival plot of control, *R26-ErCre;Tardbp*<sup>+/F</sup>, and *R26-ErCre;Tardbp*<sup>F/F</sup> mice following treatment with tamoxifen diet.



**Table S1. Top 30 low *P* value hits of differentially expressed genes identified between control and Tardbp-KO ES cells**

| Gene symbol   | iTDPKO-1 (RPKM) | iTDPKO-2 (RPKM) | iTDPKO-3 (RPKM) | cTDP-1 (RPKM) | cTDP-2 (RPKM) | Fold change | <i>P</i> value |
|---------------|-----------------|-----------------|-----------------|---------------|---------------|-------------|----------------|
| 9030409G11Rik | 0.522758        | 0.805848        | 0.536447        | 11.2826       | 12.7248       | -17.9599    | 4.05e-195      |
| Tardbp        | 0.268818        | 0.363782        | 0.25103         | 4.21705       | 3.90988       | -13.6264    | 5.82e-84       |
| Fam73a        | 0.81858         | 0.874048        | 0.886107        | 8.52423       | 5.5301        | -9.37043    | 7.43e-128      |
| Tbc1d1        | 2.20639         | 2.07653         | 2.33996         | 16.0067       | 15.8936       | -7.35415    | 7.02e-228      |
| Rfc2          | 9.23564         | 11.0367         | 11.79           | 71.8          | 73.0135       | -6.92943    | 1.30e-277      |
| Med27         | 4.13347         | 3.01464         | 4.92048         | 24.8943       | 27.4378       | -6.68084    | 6.05e-79       |
| Pknox2        | 1.54048         | 1.37413         | 2.7521          | 10.8823       | 5.69187       | -5.97637    | 2.11e-81       |
| Usp15         | 3.65154         | 3.2335          | 3.59843         | 20.2915       | 19.0505       | -5.78478    | 1.17e-146      |
| Gnas          | 2.66274         | 2.58464         | 5.85189         | 17.5535       | 17.437        | -5.58237    | 7.22e-69       |
| Ascc1         | 8.37677         | 8.40692         | 7.02357         | 43.7665       | 43.3          | -5.34497    | 3.81e-136      |
| Tecpr1        | 1.52394         | 1.53052         | 1.72217         | 7.15085       | 8.37977       | -4.72988    | 9.36e-61       |
| Ptcd2         | 6.76655         | 6.78224         | 8.22956         | 29.4082       | 34.7043       | -4.33227    | 3.80e-92       |
| Glb1          | 30.5991         | 23.6241         | 42.1448         | 124.719       | 134.641       | -4.28104    | 0              |
| Pnpla6        | 2.22874         | 3.95951         | 4.15322         | 13.7981       | 11.0422       | -4.086      | 3.67e-101      |
| Ppp2r5c       | 5.7492          | 3.33226         | 9.12782         | 20.6639       | 20.276        | -3.89642    | 1.13e-140      |
| A230046K03Rik | 1.77563         | 2.01244         | 1.74188         | 6.97357       | 6.94853       | -3.72948    | 3.13e-64       |
| Abr           | 3.75746         | 1.9821          | 4.63272         | 10.2884       | 16.8955       | -3.63079    | 1.01e-88       |
| Radil         | 3.59818         | 3.81858         | 4.05638         | 14.3332       | 9.35929       | -3.57204    | 9.71e-74       |
| Raly          | 11.5752         | 4.03739         | 4.90926         | 29.7497       | 8.81486       | -3.52495    | 1.53e-65       |
| Hdac6         | 5.36254         | 4.09085         | 10.0862         | 20.1262       | 17.0858       | -3.50291    | 1.68e-117      |
| Cnot2         | 11.7117         | 6.94643         | 15.6948         | 33.8795       | 40.3145       | -3.37867    | 4.02e-133      |
| Acin1         | 10.4665         | 5.6133          | 4.338           | 23.9081       | 30.5742       | -3.36105    | 1.15e-82       |
| Heatr5b       | 3.15116         | 2.508           | 3.17054         | 9.48398       | 9.85523       | -3.30815    | 1.26e-83       |
| Wdhd1         | 5.99969         | 5.60904         | 6.17496         | 18.2836       | 19.6844       | -3.15999    | 1.97e-97       |
| Katna1        | 9.96776         | 9.57181         | 9.91048         | 31.135        | 27.7413       | -3.11689    | 7.86e-68       |
| Abr           | 4.83957         | 5.43079         | 2.99213         | 15.5382       | 10.2372       | -3.04585    | 5.56e-93       |
| Ss18          | 36.4408         | 41.993          | 41.8575         | 11.561        | 16.1623       | 3.19853     | 5.62e-134      |
| Uhrf1         | 29.4234         | 23.267          | 22.3903         | 5.81243       | 12.7337       | 3.64959     | 1.33e-114      |
| Rpa3          | 75.2287         | 133.297         | 52.7848         | 22.9925       | 28.1976       | 4.00289     | 8.32e-88       |
| Ddef2         | 5.95374         | 6.01087         | 5.51807         | 0.63628       | 1.82683       | 6.95352     | 6.55e-71       |

Genes with more than threefold increase or decrease are shown here. Individual RPKM for each sample are indicated. RPKM, reads per kilobase exon model per million mapped reads.

**Table S2. Summary of RNA-sequencing output**

|          | Raw reads  | Mapped reads | Align (PF), % | Alignment score (PF) | Error rate (PF), % |
|----------|------------|--------------|---------------|----------------------|--------------------|
| iTDPKO-1 | 16,753,111 | 11,318,402   | 67.56 ± 0.35  | 77.12 ± 1.43         | 0.80 ± 0.25        |
| iTDPKO-2 | 16,376,081 | 11,068,593   | 67.59 ± 3.11  | 76.45 ± 4.04         | 0.84 ± 0.18        |
| iTDPKO-3 | 6,894,876  | 4,298,955    | 62.35 ± 9.37  | 64.48 ± 12.74        | 1.95 ± 0.98        |
| cTDP-1   | 15,211,355 | 10,214,425   | 67.15 ± 0.38  | 75.39 ± 1.20         | 0.86 ± 0.18        |
| cTDP-2   | 3,554,955  | 2,240,688    | 63.03 ± 7.51  | 65.59 ± 10.29        | 2.07 ± 0.88        |

**Table S3. Pathway analysis of overlapping genes by RNA-seq. Only differential expressed genes with  $P < e^{-20}$  were included for pathway analysis**

| KEGG pathway                         | Gene number | Entrez Gene IDs                                                                              | P value* |
|--------------------------------------|-------------|----------------------------------------------------------------------------------------------|----------|
| Ribosome                             | 15          | 19941 19946 19988 20044 20055 20088 20103 22121 26961 270106<br>27207 5604065019 67115 67891 | 2.45e-7  |
| Focal adhesion                       | 11          | 110157 11461 11465 14268 16776 16777 170736 192176 22339<br>226519 286940                    | 1.28e-2  |
| Cell cycle                           | 10          | 15182 17120 17215 17216 18538 22059 22627 22628 59008 66156                                  | 5.71e-3  |
| MAPK signaling pathway               | 9           | 110157 11911 14175 15481 19056 192176 19252 22059 286940                                     | 3.78e-1  |
| Oxidative phosphorylation            | 8           | 11947 11984 12867 17992 57423 66091 66144 66416                                              | 4.02e-2  |
| Calcium signaling pathway            | 7           | 11739 12314 14683 16440 19056 22334 53313                                                    | 6.91e-2  |
| Insulin signaling pathway            | 7           | 110157 12314 14252 18746 22084 26987 56421                                                   | 1.44e-1  |
| Pyrimidine metabolism                | 6           | 110074 20020 50493 59001 69719 70428                                                         | 5.07e-2  |
| Antigen processing and presentation  | 6           | 12317 12330 13039 15481 15516 15519                                                          | 1.76e-3  |
| Cell Communication                   | 6           | 11461 11465 14268 16776 16777 226519                                                         | 7.43e-3  |
| Regulation of actin cytoskeleton     | 6           | 110157 11461 11465 14175 14268 18643                                                         | 4.54e-1  |
| Wnt signaling pathway                | 5           | 12301 19056 20377 21372 22059                                                                | 4.47e-1  |
| Tight junction                       | 5           | 11461 11465 13821 56449 67374                                                                | 2.71e-1  |
| Long-term potentiation               | 5           | 110157 11911 12314 16440 19056                                                               | 4.35e-2  |
| Glycolysis/Gluconeogenesis           | 5           | 13806 15275 15277 18746 56421                                                                | 3.46e-2  |
| Purine metabolism                    | 5           | 14450 18746 20020 59001 70428                                                                | 3.93e-1  |
| GnRH signaling pathway               | 5           | 110157 11911 12314 14683 16440                                                               | 1.66e-1  |
| Huntington's disease                 | 4           | 12314 12411 12757 22059                                                                      | 9.37e-3  |
| Leukocyte transendothelial migration | 4           | 11461 11465 18613 67374                                                                      | 2.97e-1  |
| Gap junction                         | 4           | 110157 14683 16440 22152                                                                     | 2.11e-1  |
| Cell adhesion molecules (CAMs)       | 4           | 12550 17967 18613 67374                                                                      | 1.79e-1  |
| ECM-receptor interaction             | 4           | 14268 16776 16777 226519                                                                     | 9.58e-2  |
| Axon guidance                        | 4           | 13845 13846 140570 19056                                                                     | 5.23e-1  |
| Proteasome                           | 4           | 17463 19185 26440 26441                                                                      | 2.46e-2  |
| Glutathione metabolism               | 4           | 14776 14860 14862 15926                                                                      | 2.75e-2  |
| Selenoamino acid metabolism          | 4           | 12411 15469 20768 232087                                                                     | 1.10e-2  |
| Pancreatic cancer                    | 4           | 110157 19730 22059 22339                                                                     | 2.36e-1  |
| Galactose metabolism                 | 4           | 12091 15275 15277 56421                                                                      | 1.93e-2  |

Red type indicates  $P < 0.05$ . KEGG, Kyoto Encyclopedia of Genes and Genomes.

\*Determined by hypergeometric test.
